# Supplementary material for: Immunomodulatory Effects of Aerobic Training in Obesity
Source: PubMed Central journal article supplement (PMC3065046; doi:10.1155/2011/308965), 2011-03-10
Supplement: 308965.f1.pdf [file 308965.f1.pdf]

## supplemental Table I

|                                                               | BDCA1                   |                                                 |              | BDCA2 |       |              |
|---------------------------------------------------------------|-------------------------|-------------------------------------------------|--------------|-------|-------|--------------|
|                                                               | LE                      | LNE                                             | ONE          | LE    | LNE   | ONE          |
| median (before training)                                      | 0.30                    | 0.25                                            | 0.11         | 0.07  | 0.09  | 0.15         |
| median (after training)                                       | 0.31                    | 0.23                                            | 0.29         | 0.07  | 0.10  | 0.10         |
| p (Wilcoxon-test: median before/ after training)              | 0.796                   | 0.379                                           | <b>0.019</b> | 0.865 | 1.000 | <b>0.038</b> |
| median difference                                             | 0.08                    | -0.05                                           | 0.17         | 0.00  | -0.01 | -0.04        |
| p (Kruskal-Wallis-H-test of median difference: LE, LNE , ONE) | <b>0.039</b>            |                                                 |              | 0.117 |       |              |
|                                                               | p (Mann-Whitney-U-test) | LE-LNE: 0.374<br>LNE-ONE: 0.006<br>LE-ONE:0.188 |              |       |       |              |
